# Supplementary material
Source: PubMed Central journal article supplement (PMC2805761)
Supplement: NIHMS143580-supplement-Supp_Data.pdf [file NIHMS143580-supplement-Supp_Data.pdf]

## Supplemental Material

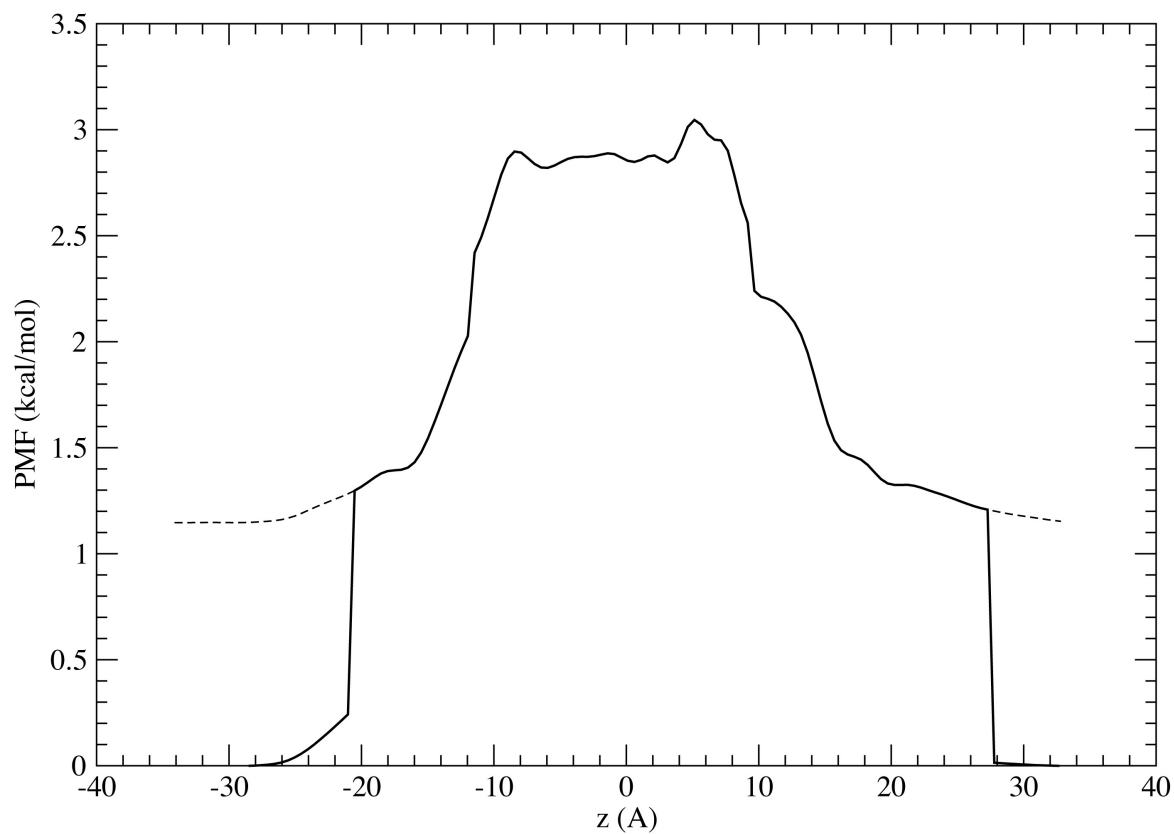

Figure S1: PMF of water permeation through AQP4 water pores. The PMF is obtained from averaged water occupancy in the four monomeric pores calculated using the 10-ns implicit ligand sampling simulation. The dashed line shows the PMF before correction for the entropy loss when water enters the channel.
